# Supplementary material for: Release Behavior of Folic Acid Grafted Hollow Hydroxyapatite as Drug Carrier
Source: Hindawi journal article supplement (doi:10.1155/2019/9562437), 2019-03-04
Supplement: f1 [file 9562437.f1.docx]

## Supplementary Materials

Figure S1 Raman spectrum of the FA-grafted hydroxyapatite

Figure S1 The Raman spectrum of the FA-grafted hydroxyapatite
